# Supplementary material for: A spatiotemporal case‐crossover model of asthma exacerbation in the City of Houston
Source: PubMed Central journal article supplement — Stat (Int Stat Inst). 2021 May 6;10(1):e357. doi: 10.1002/sta4.357 (PMC9286634; doi:10.1002/sta4.357), 2021-05-06
Supplement: STA4-10-0-s001.pdf [file STA4-10-0-s001.pdf]

## Spatial Case-crossover

### Raw data

```
kable(head(asthma.15), digits = 3)
```

| Date      | Year | HourofDay | hr | time_of_day | nbhd       | count | month_num | month | dow      | weeko |
|-----------|------|-----------|----|-------------|------------|-------|-----------|-------|----------|-------|
| 01/1/2015 | 2015 | 0:00:00   | 0  | night       | ACRES HOME | 0     | 1         | Jan   | Thursday |       |
| 01/1/2015 | 2015 | 1:00:00   | 1  | night       | ACRES HOME | 0     | 1         | Jan   | Thursday |       |
| 01/1/2015 | 2015 | 2:00:00   | 2  | night       | ACRES HOME | 0     | 1         | Jan   | Thursday |       |
| 01/1/2015 | 2015 | 3:00:00   | 3  | night       | ACRES HOME | 0     | 1         | Jan   | Thursday |       |
| 01/1/2015 | 2015 | 4:00:00   | 4  | night       | ACRES HOME | 0     | 1         | Jan   | Thursday |       |
| 01/1/2015 | 2015 | 5:00:00   | 5  | night       | ACRES HOME | 0     | 1         | Jan   | Thursday |       |

### Distribution of daily # asthma attacks by month and weekday

One observation per unique combo of snbr/month/weekday indicator (n = 2112).

```
ggplot(asthma.ag.month, aes(x=ct, fill = weekday_ind)) +
  geom_bar()+ facet_wrap(month~.) + xlab("# asthma attacks") + ylab("Frequency")
```

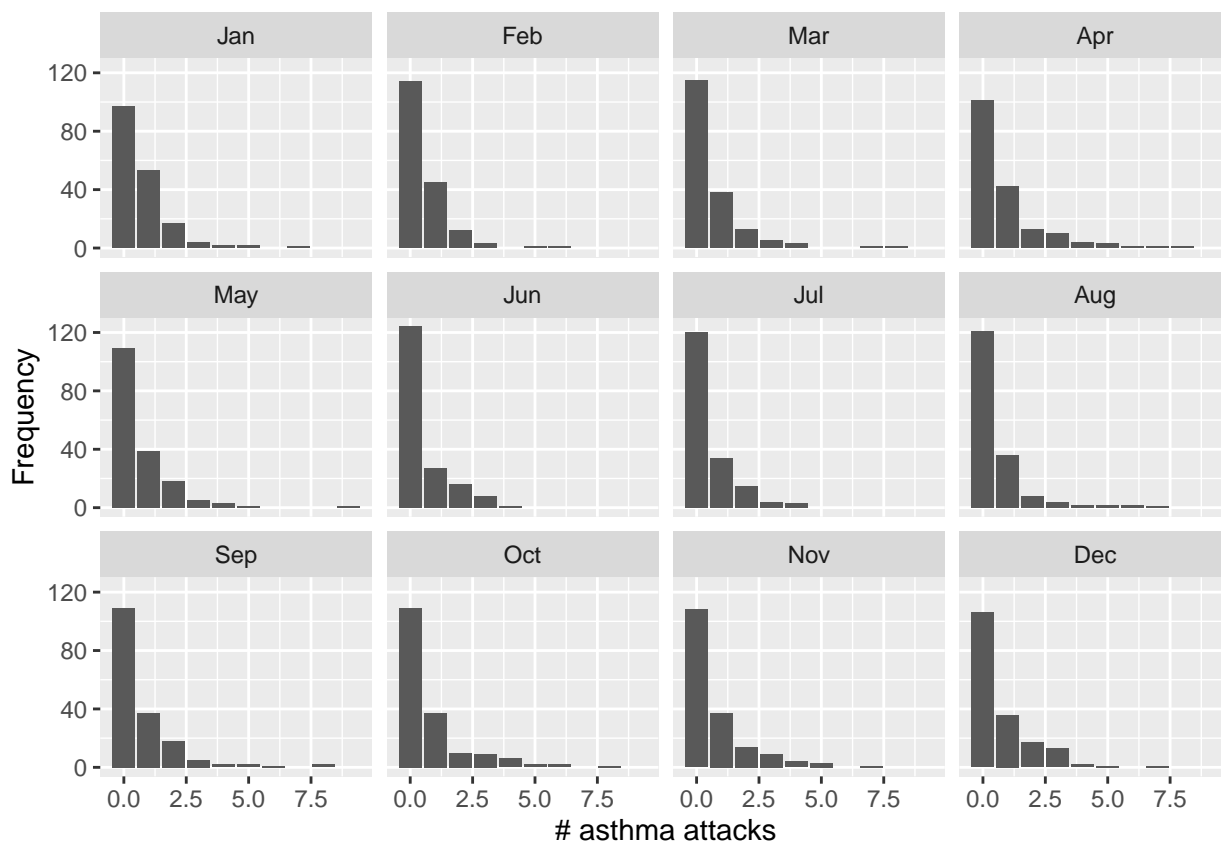

## Distribution of daily # asthma attacks by month and time of day

One observation per unique combo of snbr/month/time of day (n = 4224).

```
# ggplot(asthma.ag.tod, aes(x=ct, fill = time_of_day)) +  
#   geom_bar()+ facet_wrap(month~.) + xlab("# asthma attacks") + ylab("Frequency")
```

## Distribution of daily # asthma attacks by month

One observation per unique combo of snbr/month (n = 1056).

```
ggplot(asthma.ag.month, aes(x=ct)) +  
  geom_bar()+ facet_wrap(month~.) + xlab("# asthma attacks") + ylab("Frequency")
```

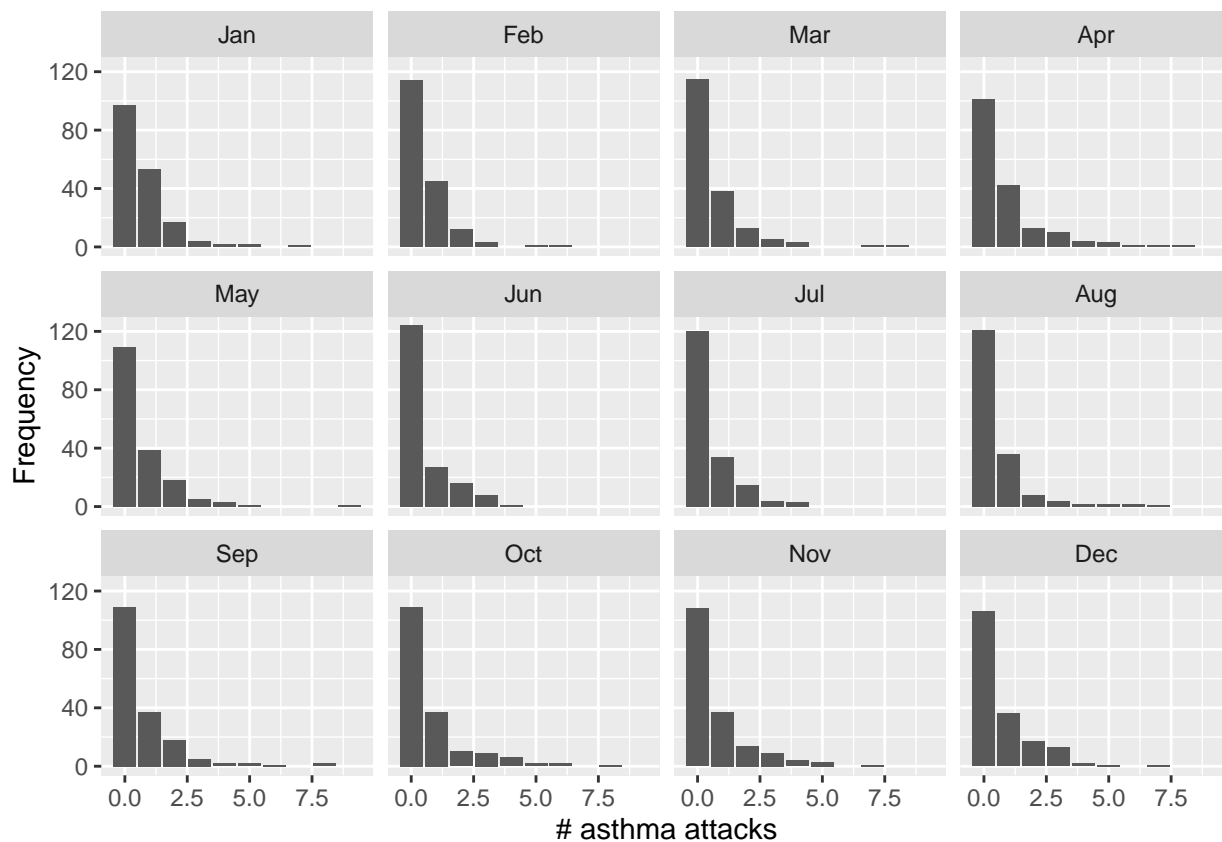

## Distribution of daily # asthma attacks by weekday indicator and time of day (snbr level)

One observation per unique combo of snbr/weekday indicator/time of day (n = 704).

```
ggplot(asthma.ag.tod.wk, aes(x=ct, fill = weekday_ind)) +  
  geom_bar()+ facet_wrap(time_of_day~.) + xlab("# asthma attacks") + ylab("Frequency")
```

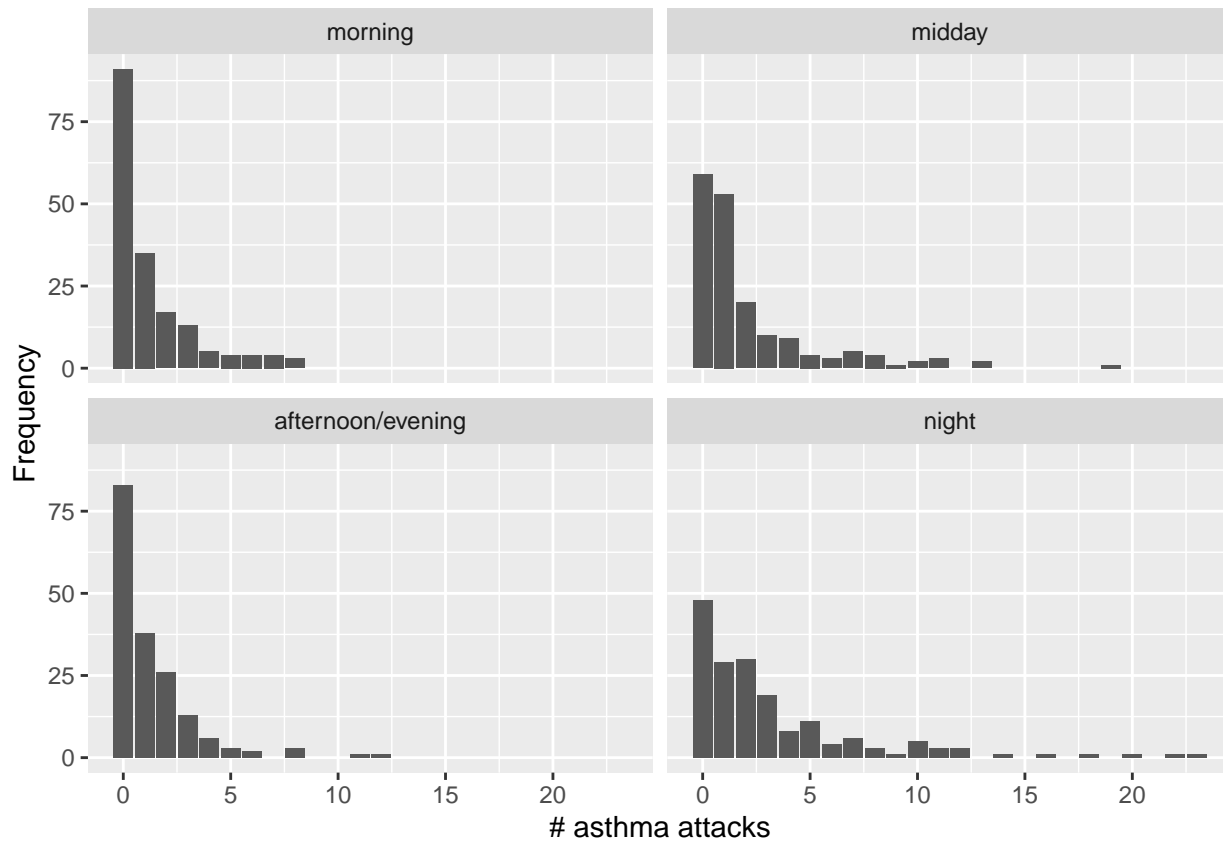

Strata: Month, weekday indicator

Model with ozone

$$Y|X, Z, \beta \sim \text{quasipoisson}(\mu) \mu = E(Y|X, Z, \beta) = X\beta + ZZ \sim \text{CAR}()$$

## Non spatial model

```

asthma.ag.month$strata = factor(paste(asthma.ag.month$weekday_ind,
                                     asthma.ag.month$month))
#asthma.ag$strata <- factor(asthma.ag$strata, levels(asthma.ag.tod.wk$strata)[c(1,2,3,4,5,6,8,7)])
X <- model.matrix(ct ~ 1 + ozone + strata, data = asthma.ag.month)
#dimnames(X)[[2]][3:13] <- as.character(levels(asthma.ag$month))[1:11]
#dimnames(X)[[2]][14] <- "weekday=T"
Z <- model.matrix(~ 1 + factor(nbhd), data = asthma.ag.month)
asthmaCAR_month<- hglm(y = asthma.ag.month$ct, X = X, Z = Z, family = quasipoisson(link = "log"),
                      rand.family = gaussian())

out = summary(asthmaCAR_month)
kable(out$FixCoefMat, digits = 3)

```

|             | Estimate | Std. Error | t-value | Pr(> t ) |
|-------------|----------|------------|---------|----------|
| (Intercept) | 0.090    | 1.308      | 0.069   | 0.945    |
| ozone       | -0.052   | 0.041      | -1.288  | 0.198    |
| strata0 Aug | -0.080   | 0.504      | -0.158  | 0.875    |
| strata0 Dec | 0.313    | 0.388      | 0.808   | 0.419    |

|             | Estimate | Std. Error | t-value | Pr(> t ) |
|-------------|----------|------------|---------|----------|
| strata0 Feb | 0.078    | 0.546      | 0.143   | 0.886    |
| strata0 Jan | 0.013    | 0.222      | 0.058   | 0.954    |
| strata0 Jul | -0.166   | 0.481      | -0.345  | 0.730    |
| strata0 Jun | -0.042   | 0.357      | -0.117  | 0.907    |
| strata0 Mar | 0.030    | 0.401      | 0.075   | 0.940    |
| strata0 May | 0.186    | 0.454      | 0.410   | 0.682    |
| strata0 Nov | 0.612    | 0.596      | 1.028   | 0.304    |
| strata0 Oct | -0.054   | 0.255      | -0.212  | 0.833    |
| strata0 Sep | 0.411    | 0.473      | 0.868   | 0.385    |
| strata1 Apr | 1.069    | 0.176      | 6.060   | 0.000    |
| strata1 Aug | 1.172    | 0.413      | 2.841   | 0.005    |
| strata1 Dec | 1.174    | 0.310      | 3.784   | 0.000    |
| strata1 Feb | 1.076    | 0.484      | 2.225   | 0.026    |
| strata1 Jan | 0.759    | 0.177      | 4.283   | 0.000    |
| strata1 Jul | 1.020    | 0.423      | 2.415   | 0.016    |
| strata1 Jun | 0.566    | 0.226      | 2.503   | 0.012    |
| strata1 Mar | 0.767    | 0.192      | 4.005   | 0.000    |
| strata1 May | 0.899    | 0.200      | 4.487   | 0.000    |
| strata1 Nov | 1.465    | 0.505      | 2.902   | 0.004    |
| strata1 Oct | 0.948    | 0.173      | 5.481   | 0.000    |
| strata1 Sep | 1.146    | 0.293      | 3.916   | 0.000    |

```

asthma.ag.month$strata = factor(paste(asthma.ag.month$weekday_ind,
                                     asthma.ag.month$month))
#asthma.ag$strata <- factor(asthma.ag$strata, levels(asthma.ag.tod.wk$strata)[c(1,2,3,4,5,6,8,7)])
X <- model.matrix(ct ~ 1 + ozone + strata, data = asthma.ag.month)
#dimnames(X)[[2]][3:13] <- as.character(levels(asthma.ag$month))[1:11]
#dimnames(X)[[2]][14] <- "weekday=T"
Z <- model.matrix(~ 1 + factor(nbhd), data = asthma.ag.month)
asthmaCAR_month<- hglm(y = asthma.ag.month$ct, X = X, Z = Z, family = quasipoisson(link = "log"),
                      rand.family = CAR(D = hausMat))

out = summary(asthmaCAR_month)
kable(out$FixCoefMat, digits = 3)

```

|             | Estimate | Std. Error | t-value | Pr(> t ) |
|-------------|----------|------------|---------|----------|
| (Intercept) | 2.207    | 1.281      | 1.723   | 0.085    |
| ozone       | -0.053   | 0.040      | -1.312  | 0.190    |
| strata0 Aug | -0.074   | 0.500      | -0.148  | 0.883    |
| strata0 Dec | 0.317    | 0.384      | 0.826   | 0.409    |
| strata0 Feb | 0.084    | 0.541      | 0.155   | 0.876    |
| strata0 Jan | 0.014    | 0.220      | 0.062   | 0.950    |
| strata0 Jul | -0.161   | 0.477      | -0.337  | 0.736    |
| strata0 Jun | -0.038   | 0.354      | -0.107  | 0.914    |
| strata0 Mar | 0.034    | 0.397      | 0.085   | 0.932    |
| strata0 May | 0.191    | 0.450      | 0.425   | 0.671    |
| strata0 Nov | 0.620    | 0.591      | 1.049   | 0.294    |
| strata0 Oct | -0.052   | 0.253      | -0.204  | 0.838    |
| strata0 Sep | 0.416    | 0.469      | 0.887   | 0.375    |
| strata1 Apr | 1.070    | 0.175      | 6.124   | 0.000    |
| strata1 Aug | 1.177    | 0.409      | 2.878   | 0.004    |

|             | Estimate | Std. Error | t-value | Pr(> t ) |
|-------------|----------|------------|---------|----------|
| strata1 Dec | 1.177    | 0.307      | 3.830   | 0.000    |
| strata1 Feb | 1.082    | 0.480      | 2.257   | 0.024    |
| strata1 Jan | 0.759    | 0.175      | 4.325   | 0.000    |
| strata1 Jul | 1.025    | 0.419      | 2.448   | 0.014    |
| strata1 Jun | 0.568    | 0.224      | 2.534   | 0.011    |
| strata1 Mar | 0.768    | 0.190      | 4.049   | 0.000    |
| strata1 May | 0.901    | 0.198      | 4.537   | 0.000    |
| strata1 Nov | 1.472    | 0.501      | 2.939   | 0.003    |
| strata1 Oct | 0.948    | 0.171      | 5.542   | 0.000    |
| strata1 Sep | 1.150    | 0.290      | 3.960   | 0.000    |

## Model with temp

### non spatial

```
X <- model.matrix(ct ~ 1 + temp + strata , data = asthma.ag.month)
dimnames(X)[[2]][3:13] <- as.character(levels(asthma.ag.month$month))[1:11]
dimnames(X)[[2]][14] <- "weekday=T"
Z <- model.matrix(~ 1 + factor(nbhd), data = asthma.ag.month)
asthmaCAR_month<- hglm(y = asthma.ag.month$ct, X = X, Z = Z, family = quasipoisson(link = "log"),
                      rand.family = gaussian())
out = summary(asthmaCAR_month);round(out$FixCoefMat,3)
```

```
##           Estimate Std. Error t-value Pr(>|t|)
## (Intercept)  11.554     9.787   1.181  0.238
## temp        -0.197     0.156  -1.269  0.205
## Jan          2.270     2.310   0.983  0.326
## Feb          3.283     2.679   1.226  0.220
## Mar          1.991     2.019   0.986  0.324
## Apr         -2.335     1.791  -1.304  0.192
## May          1.173     1.492   0.786  0.432
## Jun         -0.788     0.387  -2.036  0.042
## Jul          1.064     1.171   0.909  0.364
## Aug         -0.646     0.341  -1.895  0.058
## Sep          4.044     3.276   1.234  0.217
## Oct          4.471     3.706   1.207  0.228
## Nov          3.729     3.051   1.222  0.222
## weekday=T    0.681     0.311   2.189  0.029
## strata1 Aug   3.522     2.236   1.575  0.115
## strata1 Dec   4.308     2.736   1.575  0.115
## strata1 Feb   2.548     1.624   1.570  0.117
## strata1 Jan  -1.633     1.907  -0.856  0.392
## strata1 Jul   2.334     1.433   1.629  0.104
## strata1 Jun   0.628     0.258   2.437  0.015
## strata1 Mar   1.117     0.388   2.880  0.004
## strata1 May  -1.448     1.763  -0.822  0.411
## strata1 Nov   5.095     3.346   1.523  0.128
## strata1 Oct   5.355     3.456   1.550  0.121
## strata1 Sep   4.681     3.028   1.546  0.122
```

```
kable(out$FixCoefMat, digits = 3)
```

|              | Estimate | Std. Error | t-value | Pr(> t ) |
|--------------|----------|------------|---------|----------|
| (Intercept)  | 11.554   | 9.787      | 1.181   | 0.238    |
| temp         | -0.197   | 0.156      | -1.269  | 0.205    |
| Jan          | 2.270    | 2.310      | 0.983   | 0.326    |
| Feb          | 3.283    | 2.679      | 1.226   | 0.220    |
| Mar          | 1.991    | 2.019      | 0.986   | 0.324    |
| Apr          | -2.335   | 1.791      | -1.304  | 0.192    |
| May          | 1.173    | 1.492      | 0.786   | 0.432    |
| Jun          | -0.788   | 0.387      | -2.036  | 0.042    |
| Jul          | 1.064    | 1.171      | 0.909   | 0.364    |
| Aug          | -0.646   | 0.341      | -1.895  | 0.058    |
| Sep          | 4.044    | 3.276      | 1.234   | 0.217    |
| Oct          | 4.471    | 3.706      | 1.207   | 0.228    |
| Nov          | 3.729    | 3.051      | 1.222   | 0.222    |
| weekday=T    | 0.681    | 0.311      | 2.189   | 0.029    |
| strata1 Aug  | 3.522    | 2.236      | 1.575   | 0.115    |
| strata1 Dec  | 4.308    | 2.736      | 1.575   | 0.115    |
| strata1 Feb  | 2.548    | 1.624      | 1.570   | 0.117    |
| strata1 Jan  | -1.633   | 1.907      | -0.856  | 0.392    |
| strata1 Jul  | 2.334    | 1.433      | 1.629   | 0.104    |
| strata1 Jun  | 0.628    | 0.258      | 2.437   | 0.015    |
| strata1 Mar  | 1.117    | 0.388      | 2.880   | 0.004    |
| strata1 May  | -1.448   | 1.763      | -0.822  | 0.411    |
| strata1 Nov  | 5.095    | 3.346      | 1.523   | 0.128    |
| strata1 Oct  | 5.355    | 3.456      | 1.550   | 0.121    |
| strata1 Sep  | 4.681    | 3.028      | 1.546   | 0.122    |
| #### spatial |          |            |         |          |

```
X <- model.matrix(ct ~ 1 + temp + strata , data = asthma.ag.month)
dimnames(X)[[2]][3:13] <- as.character(levels(asthma.ag.month$month))[1:11]
dimnames(X)[[2]][14] <- "weekday=T"
Z <- model.matrix(~ 1 + factor(nbhd), data = asthma.ag.month)
asthmaCAR_month<- hglm(y = asthma.ag.month$ct, X = X, Z = Z, family = quasipoisson(link = "log"),
  rand.family = CAR(D = hausMat))
out = summary(asthmaCAR_month);round(out$FixCoefMat,3)
```

```
##          Estimate Std. Error t-value Pr(>|t|)
## (Intercept)    9.901     9.650   1.026  0.305
## temp          -0.137     0.154  -0.894  0.371
## Jan            1.385     2.283   0.606  0.544
## Feb            2.254     2.647   0.851  0.395
## Mar            1.218     1.995   0.610  0.542
## Apr           -1.649     1.770  -0.932  0.352
## May            0.606     1.475   0.411  0.681
## Jun           -0.668     0.383  -1.744  0.081
## Jul            0.621     1.157   0.537  0.591
## Aug           -0.547     0.337  -1.624  0.105
## Sep            2.783     3.239   0.859  0.390
## Oct            3.045     3.663   0.831  0.406
## Nov            2.556     3.016   0.847  0.397
## weekday=T      0.782     0.308   2.538  0.011
## strata1 Aug    2.662     2.210   1.205  0.228
## strata1 Dec    3.256     2.704   1.204  0.229
```

```
## strata1 Feb      1.926      1.605      1.200      0.230
## strata1 Jan     -0.901      1.885     -0.478      0.633
## strata1 Jul      1.787      1.417      1.261      0.207
## strata1 Jun      0.561      0.255      2.197      0.028
## strata1 Mar      0.984      0.383      2.567      0.010
## strata1 May     -0.772      1.743     -0.443      0.658
## strata1 Nov      3.807      3.308      1.151      0.250
## strata1 Oct      4.025      3.416      1.178      0.239
## strata1 Sep      3.515      2.994      1.174      0.240
```

```
kable(out$FixCoefMat, digits = 3)
```

|             | Estimate | Std. Error | t-value | Pr(> t ) |
|-------------|----------|------------|---------|----------|
| (Intercept) | 9.901    | 9.650      | 1.026   | 0.305    |
| temp        | -0.137   | 0.154      | -0.894  | 0.371    |
| Jan         | 1.385    | 2.283      | 0.606   | 0.544    |
| Feb         | 2.254    | 2.647      | 0.851   | 0.395    |
| Mar         | 1.218    | 1.995      | 0.610   | 0.542    |
| Apr         | -1.649   | 1.770      | -0.932  | 0.352    |
| May         | 0.606    | 1.475      | 0.411   | 0.681    |
| Jun         | -0.668   | 0.383      | -1.744  | 0.081    |
| Jul         | 0.621    | 1.157      | 0.537   | 0.591    |
| Aug         | -0.547   | 0.337      | -1.624  | 0.105    |
| Sep         | 2.783    | 3.239      | 0.859   | 0.390    |
| Oct         | 3.045    | 3.663      | 0.831   | 0.406    |
| Nov         | 2.556    | 3.016      | 0.847   | 0.397    |
| weekday=T   | 0.782    | 0.308      | 2.538   | 0.011    |
| strata1 Aug | 2.662    | 2.210      | 1.205   | 0.228    |
| strata1 Dec | 3.256    | 2.704      | 1.204   | 0.229    |
| strata1 Feb | 1.926    | 1.605      | 1.200   | 0.230    |
| strata1 Jan | -0.901   | 1.885      | -0.478  | 0.633    |
| strata1 Jul | 1.787    | 1.417      | 1.261   | 0.207    |
| strata1 Jun | 0.561    | 0.255      | 2.197   | 0.028    |
| strata1 Mar | 0.984    | 0.383      | 2.567   | 0.010    |
| strata1 May | -0.772   | 1.743      | -0.443  | 0.658    |
| strata1 Nov | 3.807    | 3.308      | 1.151   | 0.250    |
| strata1 Oct | 4.025    | 3.416      | 1.178   | 0.239    |
| strata1 Sep | 3.515    | 2.994      | 1.174   | 0.240    |

## Model with ozone and temp

### non-spatial

```
X <- model.matrix(ct ~ 1 + temp + ozone + strata , data = asthma.ag.month)
#dimnames(X)[[2]][4:14] <- as.character(levels(asthma.ag$month))[1:11]
#dimnames(X)[[2]][15] <- "weekday=T"
Z <- model.matrix(~ 1 + factor(nbhd), data = asthma.ag.month)
asthmaCAR_month<- hglm(y = asthma.ag.month$ct, X = X, Z = Z, family = quasipoisson(link = "log"),
                      rand.family = gaussian())

out = summary(asthmaCAR_month);round(out$FixCoefMat,3)
```

```
## Estimate Std. Error t-value Pr(>|t|)
```

```

## (Intercept) 10.419      9.841   1.059   0.290
## temp        -0.167      0.158  -1.059   0.290
## ozone       -0.045      0.041  -1.082   0.279
## strata0 Aug  2.308      2.310   0.999   0.318
## strata0 Dec  3.124      2.682   1.165   0.244
## strata0 Feb  2.141      2.022   1.059   0.290
## strata0 Jan -1.914      1.832  -1.045   0.296
## strata0 Jul  1.338      1.499   0.892   0.372
## strata0 Jun -0.428      0.510  -0.839   0.401
## strata0 Mar  1.203      1.178   1.021   0.307
## strata0 May -0.163      0.561  -0.291   0.771
## strata0 Nov  4.024      3.276   1.228   0.219
## strata0 Oct  3.900      3.742   1.042   0.297
## strata0 Sep  3.605      3.053   1.181   0.238
## strata1 Apr  0.781      0.325   2.405   0.016
## strata1 Aug  3.499      2.235   1.565   0.118
## strata1 Dec  4.062      2.745   1.480   0.139
## strata1 Feb  2.727      1.632   1.671   0.095
## strata1 Jan -1.281      1.934  -0.662   0.508
## strata1 Jul  2.477      1.439   1.722   0.085
## strata1 Jun  0.731      0.275   2.663   0.008
## strata1 Mar  1.124      0.388   2.900   0.004
## strata1 May -1.005      1.809  -0.556   0.579
## strata1 Nov  4.970      3.347   1.485   0.138
## strata1 Oct  4.664      3.513   1.328   0.184
## strata1 Sep  4.354      3.042   1.431   0.153

```

```
kable(out$FixCoefMat, digits = 3)
```

|             | Estimate | Std. Error | t-value | Pr(> t ) |
|-------------|----------|------------|---------|----------|
| (Intercept) | 10.419   | 9.841      | 1.059   | 0.290    |
| temp        | -0.167   | 0.158      | -1.059  | 0.290    |
| ozone       | -0.045   | 0.041      | -1.082  | 0.279    |
| strata0 Aug | 2.308    | 2.310      | 0.999   | 0.318    |
| strata0 Dec | 3.124    | 2.682      | 1.165   | 0.244    |
| strata0 Feb | 2.141    | 2.022      | 1.059   | 0.290    |
| strata0 Jan | -1.914   | 1.832      | -1.045  | 0.296    |
| strata0 Jul | 1.338    | 1.499      | 0.892   | 0.372    |
| strata0 Jun | -0.428   | 0.510      | -0.839  | 0.401    |
| strata0 Mar | 1.203    | 1.178      | 1.021   | 0.307    |
| strata0 May | -0.163   | 0.561      | -0.291  | 0.771    |
| strata0 Nov | 4.024    | 3.276      | 1.228   | 0.219    |
| strata0 Oct | 3.900    | 3.742      | 1.042   | 0.297    |
| strata0 Sep | 3.605    | 3.053      | 1.181   | 0.238    |
| strata1 Apr | 0.781    | 0.325      | 2.405   | 0.016    |
| strata1 Aug | 3.499    | 2.235      | 1.565   | 0.118    |
| strata1 Dec | 4.062    | 2.745      | 1.480   | 0.139    |
| strata1 Feb | 2.727    | 1.632      | 1.671   | 0.095    |
| strata1 Jan | -1.281   | 1.934      | -0.662  | 0.508    |
| strata1 Jul | 2.477    | 1.439      | 1.722   | 0.085    |
| strata1 Jun | 0.731    | 0.275      | 2.663   | 0.008    |
| strata1 Mar | 1.124    | 0.388      | 2.900   | 0.004    |
| strata1 May | -1.005   | 1.809      | -0.556  | 0.579    |
| strata1 Nov | 4.970    | 3.347      | 1.485   | 0.138    |



|              | Estimate | Std. Error | t-value | Pr(> t ) |
|--------------|----------|------------|---------|----------|
| strata1 Oct  | 4.664    | 3.513      | 1.328   | 0.184    |
| strata1 Sep  | 4.354    | 3.042      | 1.431   | 0.153    |
| #### spatial |          |            |         |          |

```
X <- model.matrix(ct ~ 1 + temp + ozone + strata , data = asthma.ag.month)
#dimnames(X)[[2]][4:14] <- as.character(levels(asthma.ag$month))[1:11]
#dimnames(X)[[2]][15] <- "weekday=T"
Z <- model.matrix(~ 1 + factor(nbhd), data = asthma.ag.month)
asthmaCAR_month<- hglm(y = asthma.ag.month$ct, X = X, Z = Z, family = quasipoisson(link = "log"),
                      rand.family = CAR(D = hausMat))

out = summary(asthmaCAR_month);round(out$FixCoefMat,3)
```

```
##           Estimate Std. Error t-value Pr(>|t|)
## (Intercept)  8.648    9.705  0.891  0.373
## temp        -0.105    0.156 -0.670  0.503
## ozone       -0.048    0.041 -1.172  0.241
## strata0 Aug  1.418    2.283  0.621  0.534
## strata0 Dec  2.074    2.650  0.783  0.434
## strata0 Feb  1.373    1.998  0.687  0.492
## strata0 Jan -1.191    1.812 -0.657  0.511
## strata0 Jul  0.779    1.482  0.526  0.599
## strata0 Jun -0.280    0.506 -0.554  0.579
## strata0 Mar  0.767    1.164  0.659  0.510
## strata0 May -0.028    0.556 -0.051  0.959
## strata0 Nov  2.752    3.238  0.850  0.395
## strata0 Oct  2.420    3.699  0.654  0.513
## strata0 Sep  2.413    3.018  0.800  0.424
## strata1 Apr  0.889    0.321  2.768  0.006
## strata1 Aug  2.631    2.209  1.191  0.234
## strata1 Dec  2.983    2.713  1.099  0.272
## strata1 Feb  2.113    1.612  1.311  0.190
## strata1 Jan -0.517    1.912 -0.270  0.787
## strata1 Jul  1.936    1.422  1.361  0.174
## strata1 Jun  0.671    0.272  2.469  0.014
## strata1 Mar  0.991    0.383  2.586  0.010
## strata1 May -0.291    1.789 -0.162  0.871
## strata1 Nov  3.662    3.309  1.107  0.268
## strata1 Oct  3.272    3.473  0.942  0.346
## strata1 Sep  3.155    3.008  1.049  0.294
```

```
kable(out$FixCoefMat, digits = 3)
```

|             | Estimate | Std. Error | t-value | Pr(> t ) |
|-------------|----------|------------|---------|----------|
| (Intercept) | 8.648    | 9.705      | 0.891   | 0.373    |
| temp        | -0.105   | 0.156      | -0.670  | 0.503    |
| ozone       | -0.048   | 0.041      | -1.172  | 0.241    |
| strata0 Aug | 1.418    | 2.283      | 0.621   | 0.534    |
| strata0 Dec | 2.074    | 2.650      | 0.783   | 0.434    |
| strata0 Feb | 1.373    | 1.998      | 0.687   | 0.492    |
| strata0 Jan | -1.191   | 1.812      | -0.657  | 0.511    |
| strata0 Jul | 0.779    | 1.482      | 0.526   | 0.599    |

|             | Estimate | Std. Error | t-value | Pr(> t ) |
|-------------|----------|------------|---------|----------|
| strata0 Jun | -0.280   | 0.506      | -0.554  | 0.579    |
| strata0 Mar | 0.767    | 1.164      | 0.659   | 0.510    |
| strata0 May | -0.028   | 0.556      | -0.051  | 0.959    |
| strata0 Nov | 2.752    | 3.238      | 0.850   | 0.395    |
| strata0 Oct | 2.420    | 3.699      | 0.654   | 0.513    |
| strata0 Sep | 2.413    | 3.018      | 0.800   | 0.424    |
| strata1 Apr | 0.889    | 0.321      | 2.768   | 0.006    |
| strata1 Aug | 2.631    | 2.209      | 1.191   | 0.234    |
| strata1 Dec | 2.983    | 2.713      | 1.099   | 0.272    |
| strata1 Feb | 2.113    | 1.612      | 1.311   | 0.190    |
| strata1 Jan | -0.517   | 1.912      | -0.270  | 0.787    |
| strata1 Jul | 1.936    | 1.422      | 1.361   | 0.174    |
| strata1 Jun | 0.671    | 0.272      | 2.469   | 0.014    |
| strata1 Mar | 0.991    | 0.383      | 2.586   | 0.010    |
| strata1 May | -0.291   | 1.789      | -0.162  | 0.871    |
| strata1 Nov | 3.662    | 3.309      | 1.107   | 0.268    |
| strata1 Oct | 3.272    | 3.473      | 0.942   | 0.346    |
| strata1 Sep | 3.155    | 3.008      | 1.049   | 0.294    |

```
## non wpq5iql
asthmaCAR_month<- hglm(y = asthma.ag.month$ct, X = X, Z = Z, family = quasipoisson(link = "log"),
  rand.family = gaussian())

out = summary(asthmaCAR_month);#round(out$FixCoefMat,3)
kable(out$FixCoefMat, digits = 3)
```

|             | Estimate | Std. Error | t-value | Pr(> t ) |
|-------------|----------|------------|---------|----------|
| (Intercept) | 10.419   | 9.841      | 1.059   | 0.290    |
| temp        | -0.167   | 0.158      | -1.059  | 0.290    |
| ozone       | -0.045   | 0.041      | -1.082  | 0.279    |
| strata0 Aug | 2.308    | 2.310      | 0.999   | 0.318    |
| strata0 Dec | 3.124    | 2.682      | 1.165   | 0.244    |
| strata0 Feb | 2.141    | 2.022      | 1.059   | 0.290    |
| strata0 Jan | -1.914   | 1.832      | -1.045  | 0.296    |
| strata0 Jul | 1.338    | 1.499      | 0.892   | 0.372    |
| strata0 Jun | -0.428   | 0.510      | -0.839  | 0.401    |
| strata0 Mar | 1.203    | 1.178      | 1.021   | 0.307    |
| strata0 May | -0.163   | 0.561      | -0.291  | 0.771    |
| strata0 Nov | 4.024    | 3.276      | 1.228   | 0.219    |
| strata0 Oct | 3.900    | 3.742      | 1.042   | 0.297    |
| strata0 Sep | 3.605    | 3.053      | 1.181   | 0.238    |
| strata1 Apr | 0.781    | 0.325      | 2.405   | 0.016    |
| strata1 Aug | 3.499    | 2.235      | 1.565   | 0.118    |
| strata1 Dec | 4.062    | 2.745      | 1.480   | 0.139    |
| strata1 Feb | 2.727    | 1.632      | 1.671   | 0.095    |
| strata1 Jan | -1.281   | 1.934      | -0.662  | 0.508    |
| strata1 Jul | 2.477    | 1.439      | 1.722   | 0.085    |
| strata1 Jun | 0.731    | 0.275      | 2.663   | 0.008    |
| strata1 Mar | 1.124    | 0.388      | 2.900   | 0.004    |
| strata1 May | -1.005   | 1.809      | -0.556  | 0.579    |
| strata1 Nov | 4.970    | 3.347      | 1.485   | 0.138    |

|             | Estimate | Std. Error | t-value | Pr(> t ) |
|-------------|----------|------------|---------|----------|
| strata1 Oct | 4.664    | 3.513      | 1.328   | 0.184    |
| strata1 Sep | 4.354    | 3.042      | 1.431   | 0.153    |

## Strata: month, time of day

### Model with ozone

```

asthma.ag.tod$strata = factor(paste(asthma.ag.tod$time_of_day,
                                   asthma.ag.tod$month))
X <- model.matrix(ct ~ 1 + ozone +strata , data = asthma.ag.tod)
#dimnames(X)[[2]][3:13] <- as.character(levels(asthma.ag.tod$month))[1:11]
#dimnames(X)[[2]][14:16] <- c("morning", "midday", "afternoon/evening")
Z <- model.matrix(~ 1 + factor(nbhd), data = asthma.ag.tod)
asthmaCAR_month<- hglm(y = asthma.ag.tod$ct, X = X, Z = Z, family = quasipoisson(link = "log"),
                      rand.family = CAR(D = hausMat))

```

```
out = summary(asthmaCAR_month);round(out$FixCoefMat, 3)
```

```

##           Estimate Std. Error t-value Pr(>|t|)
## (Intercept)    1.437     1.384   1.038   0.300
## ozone          0.110     0.067   1.642   0.102
## stratamidday  -0.216     0.441  -0.490   0.625
## stratamorning -2.317     1.408  -1.646   0.101
## stratanight   -0.077     0.607  -0.127   0.899

```

```
kable(out$FixCoefMat, digits = 3)
```

|               | Estimate | Std. Error | t-value | Pr(> t ) |
|---------------|----------|------------|---------|----------|
| (Intercept)   | 1.437    | 1.384      | 1.038   | 0.300    |
| ozone         | 0.110    | 0.067      | 1.642   | 0.102    |
| stratamidday  | -0.216   | 0.441      | -0.490  | 0.625    |
| stratamorning | -2.317   | 1.408      | -1.646  | 0.101    |
| stratanight   | -0.077   | 0.607      | -0.127  | 0.899    |

```

asthmaCAR_month<- hglm(y = asthma.ag.tod$ct, X = X, Z = Z, family = quasipoisson(link = "log"),
                      rand.family = gaussian())

```

```
out = summary(asthmaCAR_month);round(out$FixCoefMat, 3)
```

```

##           Estimate Std. Error t-value Pr(>|t|)
## (Intercept)   -0.569     1.359  -0.418   0.676
## ozone         0.100     0.069   1.440   0.151
## stratamidday  -0.150     0.457  -0.329   0.743
## stratamorning -2.101     1.454  -1.444   0.150
## stratanight    0.016     0.628   0.025   0.980

```

```
kable(out$FixCoefMat, digits = 3)
```

|             | Estimate | Std. Error | t-value | Pr(> t ) |
|-------------|----------|------------|---------|----------|
| (Intercept) | -0.569   | 1.359      | -0.418  | 0.676    |

|               | Estimate | Std. Error | t-value | Pr(> t ) |
|---------------|----------|------------|---------|----------|
| ozone         | 0.100    | 0.069      | 1.440   | 0.151    |
| stratamidday  | -0.150   | 0.457      | -0.329  | 0.743    |
| stratamorning | -2.101   | 1.454      | -1.444  | 0.150    |
| stratanight   | 0.016    | 0.628      | 0.025   | 0.980    |

### Model with temp

```
X <- model.matrix(ct ~ 1 + temp + strata, data = asthma.ag.tod)
# dimnames(X)[[2]][3:13] <- as.character(levels(asthma.ag.tod$month))[1:11]
# dimnames(X)[[2]][14:16] <- c("morning", "midday", "afternoon/evening")
Z <- model.matrix(~ 1 + factor(nbhd), data = asthma.ag.tod)
asthmaCAR_month<- hglm(y = asthma.ag.tod$ct, X = X, Z = Z, family = quasipoisson(link = "log"),
                      rand.family = CAR(D = hausMat))
```

```
out = summary(asthmaCAR_month);round(out$FixCoefMat,3)
```

```
##           Estimate Std. Error t-value Pr(>|t|)
## (Intercept)   -11.572    11.741  -0.986   0.325
## temp           0.219     0.176   1.239   0.216
## stratamidday  -0.273     0.624  -0.438   0.662
## stratamorning -2.131     1.713  -1.244   0.214
## stratanight   0.001     0.738   0.002   0.998
```

```
asthmaCAR_month<- hglm(y = asthma.ag.tod$ct, X = X, Z = Z, family = quasipoisson(link = "log"),
                      rand.family = gaussian())
```

```
out = summary(asthmaCAR_month);round(out$FixCoefMat,3)
```

```
##           Estimate Std. Error t-value Pr(>|t|)
## (Intercept)  -10.146    12.384  -0.819   0.413
## temp          0.165     0.186   0.886   0.376
## stratamidday  -0.085     0.657  -0.129   0.898
## stratamorning -1.608     1.804  -0.892   0.373
## stratanight   0.226     0.777   0.290   0.772
```

```
#kable(out$FixCoefMat, digits = 3)
```

### Model with ozone and temp

```
X <- model.matrix(ct ~ 1 + temp + ozone + strata, data = asthma.ag.tod)
# dimnames(X)[[2]][4:14] <- as.character(levels(asthma.ag.tod$month))[1:11]
# dimnames(X)[[2]][15:17] <- c("morning", "midday", "afternoon/evening")
Z <- model.matrix(~ 1 + factor(nbhd), data = asthma.ag.tod)
asthmaCAR_month<- hglm(y = asthma.ag.tod$ct, X = X, Z = Z, family = quasipoisson(link = "log"),
                      rand.family = CAR(D = hausMat))
```

```
out = summary(asthmaCAR_month);round(out$FixCoefMat,3)
```

```
##           Estimate Std. Error t-value Pr(>|t|)
## (Intercept)   -5.668    12.684  -0.447   0.655
## temp           0.111     0.197   0.563   0.574
```

```
## ozone          0.091      0.075   1.220   0.223
## stratamidday  -0.485      0.646  -0.751   0.453
## stratamorning -3.005      1.853  -1.622   0.106
## strataniight  -0.372      0.797  -0.467   0.641
```

```
kable(out$FixCoefMat, digits = 3)
```

|               | Estimate | Std. Error | t-value | Pr(> t ) |
|---------------|----------|------------|---------|----------|
| (Intercept)   | -5.668   | 12.684     | -0.447  | 0.655    |
| temp          | 0.111    | 0.197      | 0.563   | 0.574    |
| ozone         | 0.091    | 0.075      | 1.220   | 0.223    |
| stratamidday  | -0.485   | 0.646      | -0.751  | 0.453    |
| stratamorning | -3.005   | 1.853      | -1.622  | 0.106    |
| strataniight  | -0.372   | 0.797      | -0.467  | 0.641    |

```
asthmaCAR_month<- hglm(y = asthma.ag.tod$ct, X = X, Z = Z, family = quasipoisson(link = "log"),
  rand.family = gaussian())
```

```
out = summary(asthmaCAR_month);round(out$FixCoefMat,3)
```

```
##          Estimate Std. Error t-value Pr(>|t|)
## (Intercept)   -4.685    13.219  -0.354   0.723
## temp           0.064     0.205   0.313   0.755
## ozone          0.090     0.077   1.172   0.242
## stratamidday  -0.310     0.682  -0.454   0.650
## stratamorning -2.511     1.953  -1.286   0.200
## strataniight  -0.160     0.841  -0.191   0.849
```

```
kable(out$FixCoefMat, digits = 3)
```

|               | Estimate | Std. Error | t-value | Pr(> t ) |
|---------------|----------|------------|---------|----------|
| (Intercept)   | -4.685   | 13.219     | -0.354  | 0.723    |
| temp          | 0.064    | 0.205      | 0.313   | 0.755    |
| ozone         | 0.090    | 0.077      | 1.172   | 0.242    |
| stratamidday  | -0.310   | 0.682      | -0.454  | 0.650    |
| stratamorning | -2.511   | 1.953      | -1.286  | 0.200    |
| strataniight  | -0.160   | 0.841      | -0.191  | 0.849    |

## Strata: month

### Model with Temp

```
X <- model.matrix(ct ~ 1 + temp + factor(month), data = asthma.ag.month)
#dimnames(X)[[2]][3:13] <- as.character(levels(asthma.ag.month$month))[1:11]
Z <- model.matrix(~ 1 + factor(nbhd), data = asthma.ag.month)
asthmaCAR_month<- hglm(y = asthma.ag.month$ct, X = X, Z = Z, family = quasipoisson(link = "log"),
  rand.family = CAR(D = hausMat))
```

```
out = summary(asthmaCAR_month)
kable(out$FixCoefMat, digits = 3)
```

|                  | Estimate | Std. Error | t-value | Pr(> t ) |
|------------------|----------|------------|---------|----------|
| (Intercept)      | 12.706   | 1.683      | 7.550   | 0.000    |
| temp             | -0.157   | 0.019      | -8.466  | 0.000    |
| factor(month).L  | 4.901    | 0.571      | 8.587   | 0.000    |
| factor(month).Q  | 0.706    | 0.113      | 6.227   | 0.000    |
| factor(month).C  | -1.006   | 0.158      | -6.385  | 0.000    |
| factor(month)^4  | -2.835   | 0.329      | -8.627  | 0.000    |
| factor(month)^5  | 1.953    | 0.288      | 6.790   | 0.000    |
| factor(month)^6  | -0.385   | 0.133      | -2.896  | 0.004    |
| factor(month)^7  | -0.064   | 0.095      | -0.671  | 0.502    |
| factor(month)^8  | 0.015    | 0.095      | 0.161   | 0.872    |
| factor(month)^9  | 0.595    | 0.112      | 5.321   | 0.000    |
| factor(month)^10 | -0.504   | 0.113      | -4.466  | 0.000    |
| factor(month)^11 | 0.072    | 0.102      | 0.712   | 0.476    |

```
asthmaCAR_month<- hglm(y = asthma.ag.month$ct, X = X, Z = Z, family = quasipoisson(link = "log"),
  rand.family = gaussian())

out = summary(asthmaCAR_month)
kable(out$FixCoefMat, digits = 3)
```

|                  | Estimate | Std. Error | t-value | Pr(> t ) |
|------------------|----------|------------|---------|----------|
| (Intercept)      | 10.656   | 1.691      | 6.301   | 0.000    |
| temp             | -0.158   | 0.019      | -8.415  | 0.000    |
| factor(month).L  | 4.924    | 0.577      | 8.534   | 0.000    |
| factor(month).Q  | 0.709    | 0.115      | 6.189   | 0.000    |
| factor(month).C  | -1.011   | 0.159      | -6.350  | 0.000    |
| factor(month)^4  | -2.848   | 0.332      | -8.574  | 0.000    |
| factor(month)^5  | 1.964    | 0.291      | 6.755   | 0.000    |
| factor(month)^6  | -0.389   | 0.134      | -2.897  | 0.004    |
| factor(month)^7  | -0.064   | 0.095      | -0.669  | 0.503    |
| factor(month)^8  | 0.016    | 0.095      | 0.167   | 0.867    |
| factor(month)^9  | 0.598    | 0.113      | 5.291   | 0.000    |
| factor(month)^10 | -0.506   | 0.114      | -4.443  | 0.000    |
| factor(month)^11 | 0.073    | 0.103      | 0.713   | 0.476    |

## Model with ozone

```
X <- model.matrix(ct ~ 1 + ozone + factor(month), data = asthma.ag.month)
#dimnames(X)[[2]][3:13] <- as.character(levels(asthma.ag.month$month))[1:11]
Z <- model.matrix(~ 1 + factor(nbhd), data = asthma.ag.month)
asthmaCAR_month<- hglm(y = asthma.ag.month$ct, X = X, Z = Z, family = quasipoisson(link = "log"),
  rand.family = CAR(D = hausMat))

out = summary(asthmaCAR_month);round(out$FixCoefMat, 3)
```

```
##           Estimate Std. Error t-value Pr(>|t|)
## (Intercept)      6.238      1.140   5.471   0.000
## ozone           -0.202      0.015  -13.253   0.000
## factor(month).L  1.173      0.116  10.088   0.000
```

```
## factor(month).Q      0.150      0.090      1.668      0.095
## factor(month).C     -0.092      0.087     -1.059      0.290
## factor(month)^4     -0.366      0.091     -4.016      0.000
## factor(month)^5      0.910      0.131      6.966      0.000
## factor(month)^6     -1.506      0.174     -8.634      0.000
## factor(month)^7     -0.603      0.103     -5.841      0.000
## factor(month)^8     -1.240      0.125     -9.921      0.000
## factor(month)^9     -0.275      0.090     -3.045      0.002
## factor(month)^10    0.023      0.089      0.255      0.799
## factor(month)^11   -0.499      0.102     -4.889      0.000
```

```
kable(out$FixCoefMat, digits = 3)
```

|                  | Estimate | Std. Error | t-value | Pr(> t ) |
|------------------|----------|------------|---------|----------|
| (Intercept)      | 6.238    | 1.140      | 5.471   | 0.000    |
| ozone            | -0.202   | 0.015      | -13.253 | 0.000    |
| factor(month).L  | 1.173    | 0.116      | 10.088  | 0.000    |
| factor(month).Q  | 0.150    | 0.090      | 1.668   | 0.095    |
| factor(month).C  | -0.092   | 0.087      | -1.059  | 0.290    |
| factor(month)^4  | -0.366   | 0.091      | -4.016  | 0.000    |
| factor(month)^5  | 0.910    | 0.131      | 6.966   | 0.000    |
| factor(month)^6  | -1.506   | 0.174      | -8.634  | 0.000    |
| factor(month)^7  | -0.603   | 0.103      | -5.841  | 0.000    |
| factor(month)^8  | -1.240   | 0.125      | -9.921  | 0.000    |
| factor(month)^9  | -0.275   | 0.090      | -3.045  | 0.002    |
| factor(month)^10 | 0.023    | 0.089      | 0.255   | 0.799    |
| factor(month)^11 | -0.499   | 0.102      | -4.889  | 0.000    |

```
asthmaCAR_month<- hglm(y = asthma.ag.month$ct, X = X, Z = Z, family = quasipoisson(link = "log"),
  rand.family = gaussian())
```

```
out = summary(asthmaCAR_month);round(out$FixCoefMat, 3)
```

```
##           Estimate Std. Error t-value Pr(>|t|)
## (Intercept)      4.138      1.146   3.612   0.000
## ozone           -0.202      0.015  -13.120   0.000
## factor(month).L  1.170      0.117   9.974   0.000
## factor(month).Q  0.151      0.091   1.661   0.097
## factor(month).C -0.089      0.087  -1.023   0.306
## factor(month)^4 -0.365      0.092  -3.970   0.000
## factor(month)^5  0.910      0.132   6.896   0.000
## factor(month)^6 -1.503      0.176  -8.542   0.000
## factor(month)^7 -0.603      0.104  -5.785   0.000
## factor(month)^8 -1.239      0.126  -9.821   0.000
## factor(month)^9 -0.274      0.091  -3.013   0.003
## factor(month)^10 0.023      0.090   0.258   0.797
## factor(month)^11 -0.499      0.103  -4.841   0.000
```

```
kable(out$FixCoefMat, digits = 3)
```

|             | Estimate | Std. Error | t-value | Pr(> t ) |
|-------------|----------|------------|---------|----------|
| (Intercept) | 4.138    | 1.146      | 3.612   | 0.000    |
| ozone       | -0.202   | 0.015      | -13.120 | 0.000    |

|                  | Estimate | Std. Error | t-value | Pr(> t ) |
|------------------|----------|------------|---------|----------|
| factor(month).L  | 1.170    | 0.117      | 9.974   | 0.000    |
| factor(month).Q  | 0.151    | 0.091      | 1.661   | 0.097    |
| factor(month).C  | -0.089   | 0.087      | -1.023  | 0.306    |
| factor(month)^4  | -0.365   | 0.092      | -3.970  | 0.000    |
| factor(month)^5  | 0.910    | 0.132      | 6.896   | 0.000    |
| factor(month)^6  | -1.503   | 0.176      | -8.542  | 0.000    |
| factor(month)^7  | -0.603   | 0.104      | -5.785  | 0.000    |
| factor(month)^8  | -1.239   | 0.126      | -9.821  | 0.000    |
| factor(month)^9  | -0.274   | 0.091      | -3.013  | 0.003    |
| factor(month)^10 | 0.023    | 0.090      | 0.258   | 0.797    |
| factor(month)^11 | -0.499   | 0.103      | -4.841  | 0.000    |

## Model with temp and ozone

```
X <- model.matrix(ct ~ 1 + temp + ozone + factor(month), data = asthma.ag.month)
#dimnames(X)[[2]][4:14] <- as.character(levels(asthma.ag.month$month))[1:11]
Z <- model.matrix(~ 1 + factor(nbhd), data = asthma.ag.month)
asthmaCAR_month <- hglm(y = asthma.ag.month$ct, X = X, Z = Z, family = quasipoisson(link = "log"),
  rand.family = CAR(D = hausMat))
```

```
out = summary(asthmaCAR_month); round(out$FixCoefMat, 3)
```

```
##           Estimate Std. Error t-value Pr(>|t|)
## (Intercept)      7.816     1.787   4.373   0.000
## temp            -0.026     0.023  -1.152   0.249
## ozone           -0.190     0.018 -10.330   0.000
## factor(month).L  1.912     0.653   2.925   0.003
## factor(month).Q  0.236     0.117   2.011   0.045
## factor(month).C -0.264     0.174  -1.519   0.129
## factor(month)^4 -0.792     0.381  -2.077   0.038
## factor(month)^5  1.216     0.299   4.065   0.000
## factor(month)^6 -1.533     0.178  -8.597   0.000
## factor(month)^7 -0.576     0.106  -5.449   0.000
## factor(month)^8 -1.149     0.147  -7.798   0.000
## factor(month)^9 -0.169     0.129  -1.316   0.188
## factor(month)^10 -0.080     0.127  -0.636   0.525
## factor(month)^11 -0.433     0.116  -3.730   0.000
```

```
kable(out$FixCoefMat, digits = 3)
```

|                 | Estimate | Std. Error | t-value | Pr(> t ) |
|-----------------|----------|------------|---------|----------|
| (Intercept)     | 7.816    | 1.787      | 4.373   | 0.000    |
| temp            | -0.026   | 0.023      | -1.152  | 0.249    |
| ozone           | -0.190   | 0.018      | -10.330 | 0.000    |
| factor(month).L | 1.912    | 0.653      | 2.925   | 0.003    |
| factor(month).Q | 0.236    | 0.117      | 2.011   | 0.045    |
| factor(month).C | -0.264   | 0.174      | -1.519  | 0.129    |
| factor(month)^4 | -0.792   | 0.381      | -2.077  | 0.038    |
| factor(month)^5 | 1.216    | 0.299      | 4.065   | 0.000    |
| factor(month)^6 | -1.533   | 0.178      | -8.597  | 0.000    |
| factor(month)^7 | -0.576   | 0.106      | -5.449  | 0.000    |



|                  | Estimate | Std. Error | t-value | Pr(> t ) |
|------------------|----------|------------|---------|----------|
| factor(month)^8  | -1.149   | 0.147      | -7.798  | 0.000    |
| factor(month)^9  | -0.169   | 0.129      | -1.316  | 0.188    |
| factor(month)^10 | -0.080   | 0.127      | -0.636  | 0.525    |
| factor(month)^11 | -0.433   | 0.116      | -3.730  | 0.000    |

```
asthmaCAR_month<- hglm(y = asthma.ag.month$ct, X = X, Z = Z, family = quasipoisson(link = "log"),
  rand.family = gaussian())
```

```
out = summary(asthmaCAR_month);round(out$FixCoefMat,3)
```

```
##           Estimate Std. Error t-value Pr(>|t|)
## (Intercept)      5.804      1.804   3.217  0.001
## temp            -0.028      0.023  -1.202  0.230
## ozone           -0.189      0.019 -10.197  0.000
## factor(month).L  1.948      0.661   2.949  0.003
## factor(month).Q  0.241      0.119   2.036  0.042
## factor(month).C -0.271      0.176  -1.543  0.123
## factor(month)^4 -0.814      0.385  -2.113  0.035
## factor(month)^5  1.233      0.303   4.074  0.000
## factor(month)^6 -1.532      0.180  -8.507  0.000
## factor(month)^7 -0.575      0.107  -5.385  0.000
## factor(month)^8 -1.143      0.149  -7.691  0.000
## factor(month)^9 -0.163      0.130  -1.257  0.209
## factor(month)^10 -0.086      0.128  -0.669  0.504
## factor(month)^11 -0.429      0.117  -3.666  0.000
```

```
kable(out$FixCoefMat, digits = 3)
```

|                  | Estimate | Std. Error | t-value | Pr(> t ) |
|------------------|----------|------------|---------|----------|
| (Intercept)      | 5.804    | 1.804      | 3.217   | 0.001    |
| temp             | -0.028   | 0.023      | -1.202  | 0.230    |
| ozone            | -0.189   | 0.019      | -10.197 | 0.000    |
| factor(month).L  | 1.948    | 0.661      | 2.949   | 0.003    |
| factor(month).Q  | 0.241    | 0.119      | 2.036   | 0.042    |
| factor(month).C  | -0.271   | 0.176      | -1.543  | 0.123    |
| factor(month)^4  | -0.814   | 0.385      | -2.113  | 0.035    |
| factor(month)^5  | 1.233    | 0.303      | 4.074   | 0.000    |
| factor(month)^6  | -1.532   | 0.180      | -8.507  | 0.000    |
| factor(month)^7  | -0.575   | 0.107      | -5.385  | 0.000    |
| factor(month)^8  | -1.143   | 0.149      | -7.691  | 0.000    |
| factor(month)^9  | -0.163   | 0.130      | -1.257  | 0.209    |
| factor(month)^10 | -0.086   | 0.128      | -0.669  | 0.504    |
| factor(month)^11 | -0.429   | 0.117      | -3.666  | 0.000    |

Strata: time of day/weekday indicator

Model with Temp

```

asthma.ag.tod.wk$strata = factor(paste(asthma.ag.tod.wk$weekday_ind,
                                     asthma.ag.tod.wk$time_of_day))
X <- model.matrix(ct ~ 1 + temp + strata, data = asthma.ag.tod.wk)
#dimnames(X)[[2]][3:5] <-c("morning", "midday", "afternoon/evening")
#dimnames(X)[[2]][6] <- "weekday=T"
Z <- model.matrix(~ 1 + factor(nbhd), data = asthma.ag.tod.wk)
asthmaCAR_month<- hglm(y = asthma.ag.tod.wk$ct, X = X, Z = Z, family = quasipoisson(link = "log"),
                      rand.family = CAR(D = hausMat))

out = summary(asthmaCAR_month)
kable(out$FixCoefMat, digits = 3)

```

|                           | Estimate | Std. Error | t-value | Pr(> t ) |
|---------------------------|----------|------------|---------|----------|
| (Intercept)               | -16.094  | 10.771     | -1.494  | 0.136    |
| temp                      | 0.264    | 0.161      | 1.645   | 0.100    |
| strata0 midday            | -0.624   | 0.727      | -0.859  | 0.391    |
| strata0 morning           | -2.821   | 1.781      | -1.584  | 0.114    |
| strata0 night             | -0.027   | 0.735      | -0.037  | 0.970    |
| strata1 afternoon/evening | 1.379    | 0.191      | 7.207   | 0.000    |
| strata1 midday            | 1.027    | 0.431      | 2.384   | 0.017    |
| strata1 morning           | -1.088   | 1.379      | -0.789  | 0.431    |
| strata1 night             | 1.138    | 0.566      | 2.011   | 0.045    |

```

asthmaCAR_month<- hglm(y = asthma.ag.tod.wk$ct, X = X, Z = Z, family = quasipoisson(link = "log"),
                      rand.family = gaussian())

out = summary(asthmaCAR_month)
kable(out$FixCoefMat, digits = 3)

```

|                           | Estimate | Std. Error | t-value | Pr(> t ) |
|---------------------------|----------|------------|---------|----------|
| (Intercept)               | -14.505  | 11.086     | -1.308  | 0.191    |
| temp                      | 0.208    | 0.165      | 1.258   | 0.209    |
| strata0 midday            | -0.376   | 0.748      | -0.502  | 0.616    |
| strata0 morning           | -2.196   | 1.830      | -1.200  | 0.230    |
| strata0 night             | 0.226    | 0.756      | 0.299   | 0.765    |
| strata1 afternoon/evening | 1.343    | 0.197      | 6.812   | 0.000    |
| strata1 midday            | 1.169    | 0.443      | 2.636   | 0.009    |
| strata1 morning           | -0.604   | 1.417      | -0.426  | 0.670    |
| strata1 night             | 1.331    | 0.582      | 2.288   | 0.022    |

## Model with ozone

```

asthma.ag.tod.wk$strata = factor(paste(asthma.ag.tod.wk$weekday_ind,
                                     asthma.ag.tod.wk$time_of_day))
asthma.ag.tod.wk$strata <- factor(asthma.ag.tod.wk$strata, levels(asthma.ag.tod.wk$strata)[c(7,1,2,3,4,5,6)])
X <- model.matrix(ct ~ 1 + ozone +strata, data = asthma.ag.tod.wk)
# dimnames(X)[[2]][3:5] <-c("morning", "midday", "afternoon/evening")
# dimnames(X)[[2]][6] <- "weekday=T"
Z <- model.matrix(~ 1 + factor(nbhd), data = asthma.ag.tod.wk)

```

```
asthmaCAR_month<- hglm(y = asthma.ag.tod.wk$ct, X = X, Z = Z, family = quasipoisson(link = "log"),
  rand.family = CAR(D = hausMat))
```

```
out = summary(asthmaCAR_month);round(out$FixCoefMat, 3)
```

```
##              Estimate Std. Error t-value Pr(>|t|)
## (Intercept)    -1.584     2.224  -0.712  0.476
## ozone           0.130     0.059   2.201  0.028
## strata0 afternoon/evening  1.231     1.101   1.118  0.264
## strata0 midday   0.825     0.674   1.224  0.221
## strata0 morning  -1.703     0.325  -5.234  0.000
## strata0 night    1.094     0.516   2.118  0.035
## strata1 afternoon/evening  2.640     1.185   2.229  0.026
## strata1 midday   2.327     0.826   2.816  0.005
## strata1 night    2.352     0.681   3.455  0.001
```

```
kable(out$FixCoefMat, digits = 3)
```

|                           | Estimate | Std. Error | t-value | Pr(> t ) |
|---------------------------|----------|------------|---------|----------|
| (Intercept)               | -1.584   | 2.224      | -0.712  | 0.476    |
| ozone                     | 0.130    | 0.059      | 2.201   | 0.028    |
| strata0 afternoon/evening | 1.231    | 1.101      | 1.118   | 0.264    |
| strata0 midday            | 0.825    | 0.674      | 1.224   | 0.221    |
| strata0 morning           | -1.703   | 0.325      | -5.234  | 0.000    |
| strata0 night             | 1.094    | 0.516      | 2.118   | 0.035    |
| strata1 afternoon/evening | 2.640    | 1.185      | 2.229   | 0.026    |
| strata1 midday            | 2.327    | 0.826      | 2.816   | 0.005    |
| strata1 night             | 2.352    | 0.681      | 3.455   | 0.001    |

```
asthmaCAR_month<- hglm(y = asthma.ag.tod.wk$ct, X = X, Z = Z, family = quasipoisson(link = "log"),
  rand.family = gaussian())
```

```
out = summary(asthmaCAR_month);round(out$FixCoefMat, 3)
```

```
##              Estimate Std. Error t-value Pr(>|t|)
## (Intercept)    -3.590     2.252  -1.594  0.111
## ozone           0.125     0.060   2.074  0.039
## strata0 afternoon/evening  1.135     1.122   1.012  0.312
## strata0 midday   0.766     0.686   1.116  0.265
## strata0 morning  -1.679     0.333  -5.043  0.000
## strata0 night    1.050     0.526   1.994  0.047
## strata1 afternoon/evening  2.537     1.207   2.102  0.036
## strata1 midday   2.254     0.842   2.678  0.008
## strata1 night    2.293     0.694   3.305  0.001
```

```
kable(out$FixCoefMat, digits = 3)
```

|                           | Estimate | Std. Error | t-value | Pr(> t ) |
|---------------------------|----------|------------|---------|----------|
| (Intercept)               | -3.590   | 2.252      | -1.594  | 0.111    |
| ozone                     | 0.125    | 0.060      | 2.074   | 0.039    |
| strata0 afternoon/evening | 1.135    | 1.122      | 1.012   | 0.312    |
| strata0 midday            | 0.766    | 0.686      | 1.116   | 0.265    |
| strata0 morning           | -1.679   | 0.333      | -5.043  | 0.000    |

|                           | Estimate | Std. Error | t-value | Pr(> t ) |
|---------------------------|----------|------------|---------|----------|
| strata0 night             | 1.050    | 0.526      | 1.994   | 0.047    |
| strata1 afternoon/evening | 2.537    | 1.207      | 2.102   | 0.036    |
| strata1 midday            | 2.254    | 0.842      | 2.678   | 0.008    |
| strata1 night             | 2.293    | 0.694      | 3.305   | 0.001    |

## Model with temp and ozone

```

asthma.ag.tod.wk$strata = factor(paste(asthma.ag.tod.wk$weekday_ind,
                                     asthma.ag.tod.wk$time_of_day))
asthma.ag.tod.wk$strata <- factor(asthma.ag.tod.wk$strata, levels(asthma.ag.tod.wk$strata)[c(7,1,2,3,4,5,6)])
X <- model.matrix(ct ~ 1 + temp + ozone + strata, data = asthma.ag.tod.wk)
dimnames(X)[[2]][4:6] <-c("morning", "midday", "afternoon/evening")
dimnames(X)[[2]][7] <- "weekday=T"
Z <- model.matrix(~ 1 + factor(nbhd), data = asthma.ag.tod.wk)
asthmaCAR_month<- hglm(y = asthma.ag.tod.wk$ct, X = X, Z = Z, family = quasipoisson(link = "log"),
                      rand.family = CAR(D = hausMat))

out = summary(asthmaCAR_month)
kable(out$FixCoefMat, digits = 3)

```

|                           | Estimate | Std. Error | t-value | Pr(> t ) |
|---------------------------|----------|------------|---------|----------|
| (Intercept)               | -10.546  | 12.762     | -0.826  | 0.409    |
| temp                      | 0.129    | 0.180      | 0.713   | 0.476    |
| ozone                     | 0.108    | 0.066      | 1.633   | 0.103    |
| morning                   | 1.932    | 1.469      | 1.315   | 0.189    |
| midday                    | 1.117    | 0.786      | 1.421   | 0.156    |
| afternoon/evening         | -1.920   | 0.444      | -4.328  | 0.000    |
| weekday=T                 | 1.434    | 0.700      | 2.048   | 0.041    |
| strata1 afternoon/evening | 3.390    | 1.577      | 2.149   | 0.032    |
| strata1 midday            | 2.804    | 1.059      | 2.648   | 0.008    |
| strata1 night             | 2.767    | 0.892      | 3.101   | 0.002    |

```

asthmaCAR_month<- hglm(y = asthma.ag.tod.wk$ct, X = X, Z = Z, family = quasipoisson(link = "log"),
                      rand.family = gaussian())

out = summary(asthmaCAR_month)
kable(out$FixCoefMat, digits = 3)

```

|                           | Estimate | Std. Error | t-value | Pr(> t ) |
|---------------------------|----------|------------|---------|----------|
| (Intercept)               | -8.383   | 13.076     | -0.641  | 0.522    |
| temp                      | 0.068    | 0.184      | 0.372   | 0.710    |
| ozone                     | 0.113    | 0.067      | 1.685   | 0.092    |
| morning                   | 1.513    | 1.509      | 1.002   | 0.317    |
| midday                    | 0.924    | 0.806      | 1.147   | 0.252    |
| afternoon/evening         | -1.796   | 0.456      | -3.937  | 0.000    |
| weekday=T                 | 1.233    | 0.719      | 1.714   | 0.087    |
| strata1 afternoon/evening | 2.941    | 1.620      | 1.816   | 0.070    |
| strata1 midday            | 2.512    | 1.087      | 2.311   | 0.021    |

|               | Estimate | Std. Error | t-value | Pr(> t ) |
|---------------|----------|------------|---------|----------|
| strata1 night | 2.517    | 0.916      | 2.747   | 0.006    |

```

asthma.ag.tod.wk$strata = factor(paste(asthma.ag.tod.wk$weekday_ind,
                                       asthma.ag.tod.wk$time_of_day))
asthma.ag.tod.wk$strata <- factor(asthma.ag.tod.wk$strata, levels(asthma.ag.tod.wk$strata)[c(7,1,2,3,4,5,6)])
X <- model.matrix(ct ~ 1+ temp + ozone + strata, data = asthma.ag.tod.wk)
#dimnames(X)[[2]][4:6] <-c("morning", "midday", "afternoon/evening")
#dimnames(X)[[2]][7] <- "weekday=T"
Z <- model.matrix(~ 1 + factor(nbhd), data = asthma.ag.tod.wk)
asthmaCAR_tod.wk<- hglm(y = asthma.ag.tod.wk$ct, X = X, Z = Z, family = quasipoisson(link = "log"),
                       rand.family = CAR(D = hausMat))
asthma.ag.tod.wk$resid = asthmaCAR_tod.wk$resid
p = rep(NA, times = 8)
strata_cats = levels(asthma.ag.tod.wk$strata)
i = 1
for(j in strata_cats){
  p[i] = moran.test(filter(asthma.ag.tod.wk, strata== j)$resid,
                    W_haus_5_sym)$p
  i = i +1
}
data.frame(strata = strata_cats, pval =round(p, 3))
out = summary(asthmaCAR_tod.wk); round(out$FixCoefMat,3)
kable(out$FixCoefMat, digits = 3)

```
